# Supplementary material
Source: PubMed Central journal article supplement (PMC5119017)
Supplement: AAC.01503-16_zac012165759so1.pdf [file AAC.01503-16_zac012165759so1.pdf]

1 **Table S1. List of primers used in this study**

| Primer use and target region | Primer  | Sequence (5'-3')            |
|------------------------------|---------|-----------------------------|
| Sequencing                   |         |                             |
| <i>ramR</i>                  | ramR-F  | CTGCAGTGCCCGGTGAACCCTGGCGT  |
|                              | ramR-R  | CTGCAGATTTGCTGATTCAGCAGCGAC |
| <i>acrR</i>                  | acrR-F  | ACGTAACCTCTGTAAAGTCAT       |
|                              | acrR-R  | TTAAGCTGACAAGCTCTCCG        |
| <i>oqxR</i>                  | oqxR-F  | TTCCTGACGCCGGTGTTTTA        |
|                              | oqxR-R  | CTGCGGTGCCAAAAAGAACA        |
| <i>rpsJ</i>                  | S10-FW  | TTAACCCAGGCTGATCTGCACG      |
|                              | S10-RV  | ATGCAGAACCAAAGAATCCGTAT     |
| qRT-PCR                      |         |                             |
| <i>acrA</i>                  | acrA-F  | ATGTGACGATAAACCGGCTC        |
|                              | acrA-R  | CTGGCAGTTCGGTGGTTATT        |
| <i>oqxA</i>                  | oqxAB-F | AAGGTGCTGGTGAAGTCGAT        |
|                              | oqxAB-R | GGAGACGAGGTTGGTATGGA        |
| <i>ramA</i>                  | ramA-F  | GCATCAACCGCTGCGTATT         |
|                              | ramA-R  | CGTTGCAGATGCCATTTCG         |
| <i>rarA</i>                  | rarA-F  | TGGATCGACAACCATCTTGA        |
|                              | rarA-R  | AAGGACTGCTGGGAGTCAAA        |
| <i>kpgA</i>                  | kpgA-F  | CGACCTCTTTCTCAAGGCCGA       |
|                              | kpgA-R  | GCCTGTTTGATCATCGTGCC        |
| <i>rrsE</i>                  | rrsE-F  | TTGACGTTACCCGCAGAAGAA       |
|                              | rrsE-R  | GCTTGCACCCTCCGTATTACC       |

2

3

4 **Table S2.** Expression of *acrA*, *ramA*, *oqxA*, *rarA* and *kpgA*, and mutations in *ramR* and *oqxR* in 43 tigecycline non-susceptible *K. pneumoniae*  
 5 isolates.

| Isolate                                                                                     | MIC <sup>b</sup><br>(mg/L) | Relative expression <sup>a</sup> |             |             |             |             | Mutation                             |                                      |
|---------------------------------------------------------------------------------------------|----------------------------|----------------------------------|-------------|-------------|-------------|-------------|--------------------------------------|--------------------------------------|
|                                                                                             |                            | <i>acrA</i>                      | <i>ramA</i> | <i>oqxA</i> | <i>rarA</i> | <i>kpgA</i> | <i>ramR</i>                          | <i>oqxR</i>                          |
| Clinical isolates with higher <i>acrA</i> expression but not of <i>rarA</i> and <i>oqxA</i> |                            |                                  |             |             |             |             |                                      |                                      |
| TNSKP1                                                                                      | 3                          | 2.9 ± 0.9                        | 1.1 ± 0.2   | 2.2 ± 1.2   | 1.1 ± 0.4   | 75 ± 10     | Silent mutation<br>Missense mutation | Silent mutation                      |
| TNSKP2                                                                                      | 3                          | 2.2 ± 1.0                        | 1.8 ± 0.5   | 3.2 ± 0.5   | 1.2 ± 0.3   | 72 ± 2.2    | Missense mutation                    | Silent mutation                      |
| TNSKP3                                                                                      | 3                          | 2.2 ± 0.3                        | 1.2 ± 0.2   | 1.6 ± 0.6   | 1.4 ± 0.5   | 1.3 ± 0.1   | Silent mutation<br>Missense mutation | Silent mutation<br>Missense mutation |
| TNSKP4                                                                                      | 4                          | 4.7 ± 0.1                        | 0.9 ± 0.0   | 0.7 ± 0.1   | 0.4 ± 0.0   | >800        | Missense mutation                    | Silent mutation                      |
| TNSKP5                                                                                      | 3                          | 2.3 ± 1.0                        | 7.7 ± 0.8   | 3.6 ± 0.7   | 1.2 ± 0.3   | 1.1 ± 0.1   | Missense mutation                    | Silent mutation                      |
| TNSKP6                                                                                      | 3                          | 2.7 ± 0.7                        | 3.7 ± 1.0   | 2.2 ± 0.9   | 1.3 ± 0.0   | >800        | Missense mutation                    | Silent mutation                      |
| TNSKP7                                                                                      | 3                          | 4.5 ± 1.3                        | 5.3 ± 1.8   | 1.3 ± 0.1   | 0.7 ± 0.1   | >800        | Nonsense mutation                    | Silent mutation                      |
| TNSKP8                                                                                      | 3                          | 6.4 ± 1.6                        | 2.4 ± 0.4   | 1.0 ± 0.5   | 0.4 ± 0.1   | 205 ± 33    | Missense mutation                    | Silent mutation                      |
| TNSKP9                                                                                      | 3                          | 3.9 ± 0.0                        | 6.2 ± 0.2   | 2.3 ± 0.1   | 1.1 ± 0.0   | 48 ± 7.9    | Silent mutation<br>Missense mutation | Silent mutation                      |
| TNSKP10                                                                                     | 3                          | 3.3 ± 0.1                        | 5.4 ± 0.2   | 2.6 ± 0.5   | 1.7 ± 0.2   | 56 ± 6.6    | Missense mutation                    | Silent mutation                      |
| TNSKP11                                                                                     | 3                          | 3.4 ± 0.3                        | 4.1 ± 0.1   | 1.8 ± 0.3   | 1.2 ± 0.2   | 25 ± 3.7    | Missense mutation                    | Silent mutation                      |
| TNSKP12                                                                                     | 3                          | 2.3 ± 0.4                        | 2.6 ± 1.0   | 2.3 ± 0.3   | 1.5 ± 0.3   | 32 ± 12     | Missense mutation                    | Silent mutation                      |
| TNSKP13                                                                                     | 3                          | 2.5 ± 0.3                        | 4.1 ± 0.2   | 1.9 ± 0.8   | 1.0 ± 0.4   | 1.5 ± 0.7   | Missense mutation                    | Silent mutation                      |
| TNSKP14                                                                                     | 3                          | 2.3 ± 0.7                        | 4.3 ± 1.0   | 1.3 ± 0.3   | 0.8 ± 0.2   | >800        | Missense mutation                    | Silent mutation                      |

|         |   |           |            |           |           |           |                                          |                 |
|---------|---|-----------|------------|-----------|-----------|-----------|------------------------------------------|-----------------|
| TNSKP15 | 4 | 3.0 ± 1.1 | 3.5 ± 1.4  | 2.9 ± 1.5 | 1.1 ± 0.2 | 95 ± 21   | Missense mutation                        | Silent mutation |
| TNSKP16 | 4 | 6.4 ± 2.5 | 5.3 ± 0.3  | 3.5 ± 1.0 | 1.8 ± 0.6 | >800      | Nonsense mutation                        | Silent mutation |
| TNSKP17 | 4 | 3.4 ± 1.1 | 4.0 ± 0.4  | 2.5 ± 0.9 | 1.8 ± 0.0 | >800      | Nonsense mutation                        | Silent mutation |
| TNSKP18 | 4 | 4.2 ± 0.4 | 8.5 ± 0.5  | 2.8 ± 0.3 | 1.4 ± 0.2 | 1.0 ± 0.1 | Frameshift mutation                      | Silent mutation |
| TNSKP19 | 4 | 2.0 ± 0.1 | 3.8 ± 0.2  | 1.4 ± 0.4 | 0.8 ± 0.2 | 1.9 ± 0.6 | Missense mutation                        | Silent mutation |
| TNSKP20 | 4 | 2.2 ± 0.3 | 3.7 ± 0.9  | 1.8 ± 0.4 | 1.2 ± 0.3 | 660 ± 153 | Missense mutation                        | Silent mutation |
| TNSKP21 | 4 | 5.5 ± 0.2 | 38.4 ± 1.2 | 0.5 ± 0.0 | 1.0 ± 0.0 | 1.1 ± 0.1 | Nonsense mutation                        | Silent mutation |
| TNSKP22 | 6 | 3.7 ± 0.4 | 6.1 ± 2.3  | 1.8 ± 0.6 | 1.4 ± 0.3 | 753 ± 111 | Nonsense mutation                        | Silent mutation |
| TNSKP23 | 8 | 4.7 ± 0.1 | 5.9 ± 0.0  | 2.2 ± 0.1 | 0.4 ± 0.0 | 649 ± 60  | Frameshift mutation<br>Missense mutation | Silent mutation |

---

Clinical isolates with higher *oqxA* expression but not of *ramA* and *acrA*

---

|         |   |           |           |            |            |           |                                      |                                        |
|---------|---|-----------|-----------|------------|------------|-----------|--------------------------------------|----------------------------------------|
| TNSKP24 | 3 | 1.7 ± 0.2 | 1.0 ± 0.0 | 36 ± 10.4  | 33 ± 11.3  | >800      | Silent mutation                      | Silent mutation<br>Missense mutation   |
| TNSKP25 | 3 | 1.8 ± 0.2 | 0.9 ± 0.2 | 99 ± 8.4   | 19.4 ± 1.3 | 1.3 ± 0.1 | Silent mutation<br>Missense mutation | Silent mutation<br>Missense mutation   |
| TNSKP26 | 3 | 1.9 ± 0.2 | 0.5 ± 0.0 | 32.5 ± 4.2 | 26.4 ± 2.8 | 3.0 ± 0.0 | Silent mutation                      | Missense mutation                      |
| TNSKP27 | 3 | 1.7 ± 0.1 | 0.9 ± 0.0 | 102 ± 5.4  | 417 ± 19   | 1.2 ± 0.2 | Silent mutation                      | Missense mutation                      |
| TNSKP28 | 4 | 1.6 ± 0.5 | 0.0 ± 0.0 | 33.4 ± 8.3 | 16.3 ± 5.8 | 0.7 ± 0.3 | Silent mutation                      | Missense mutation<br>Nonsense mutation |

---

Clinical isolates with higher *acrA* and *oqxA* expression

---

|         |   |           |            |           |           |           |                   |                 |
|---------|---|-----------|------------|-----------|-----------|-----------|-------------------|-----------------|
| TNSKP29 | 3 | 6.8 ± 0.5 | 7.6 ± 0.4  | 5.6 ± 1.7 | 2.6 ± 0.4 | 88 ± 23   | Missense mutation | Silent mutation |
| TNSKP30 | 3 | 9.6 ± 0.1 | 11.8 ± 0.3 | 173 ± 10  | 148 ± 0.8 | 1.2 ± 0.7 | Missense mutation | Silent mutation |

|                                                                                                                                            |   |           |            |                 |                  |            |                                      |                                      |
|--------------------------------------------------------------------------------------------------------------------------------------------|---|-----------|------------|-----------------|------------------|------------|--------------------------------------|--------------------------------------|
| TNSKP31                                                                                                                                    | 3 | 4.2 ± 0.2 | 7.6 ± 0.2  | 8.1 ± 0.9       | 4.3 ± 0.8        | 1.0 ± 0.4  | Missense mutation                    | Missense mutation<br>Silent mutation |
| TNSKP32                                                                                                                                    | 3 | 2.1 ± 0.1 | 1.1 ± 0.1  | 27 ± 3.0        | 8.4 ± 0.8        | 0.7 ± 0.2  | Silent mutation<br>Missense mutation | Missense mutation<br>Silent mutation |
| TNSKP33                                                                                                                                    | 4 | 2.3 ± 0.6 | 1.4 ± 0.3  | 138.0 ±<br>18.1 | 520.0 ±<br>118.9 | 0.2 ± 0.0  | Silent mutation                      | Silent mutation<br>Missense mutation |
| TNSKP34                                                                                                                                    | 4 | 4.4 ± 1.4 | 12.3 ± 4.4 | 10.6 ± 1.5      | 4.6 ± 1.3        | 497 ± 153  | Nonsense mutation                    | Silent mutation                      |
| TNSKP35                                                                                                                                    | 4 | 6.2 ± 1.2 | 27.2 ± 2.3 | 4.5 ± 0.7       | 0.6 ± 0.1        | 53.4 ± 7.8 | Nonsense mutation                    | Silent mutation                      |
| TNSKP36                                                                                                                                    | 6 | 3.3 ± 1.7 | 3.3 ± 1.5  | 4.4 ± 0.1       | 1.7 ± 0.4        | 106 ± 44   | Missense mutation                    | Silent mutation                      |
| TNSKP37                                                                                                                                    | 6 | 5.0 ± 1.9 | 8.6 ± 0.7  | 9.5 ± 0.4       | 3.1 ± 0.5        | 574 ± 107  | Silent mutation<br>Missense mutation | Silent mutation                      |
| TNSKP38                                                                                                                                    | 6 | 5.5 ± 0.3 | 8.6 ± 0.0  | 5.1 ± 1.5       | 2.4 ± 0.5        | 15 ± 0.7   | Missense mutation                    | Silent mutation                      |
| TNSKP39                                                                                                                                    | 8 | 4.2 ± 1.5 | 9.8 ± 1.1  | 4.1 ± 0.1       | 3.0 ± 0.4        | >800       | Frameshift mutation                  | Silent mutation                      |
| TNSKP40                                                                                                                                    | 8 | 2.7 ± 1.2 | 15 ± 2.6   | 6.7 ± 1.6       | 3.1 ± 1.5        | 0.5 ± 0.1  | Frameshift mutation                  | Missense mutation                    |
| TNSKP41                                                                                                                                    | 8 | 2.8 ± 0.1 | 1.2 ± 0.1  | 14 ± 1.1        | 7.6 ± 0.5        | 622 ± 56   | Nonsense mutation                    | Silent mutation<br>Missense mutation |
| Clinical isolates with higher <i>kpgA</i> expression with baseline expression of <i>acrA</i> , <i>ramA</i> , <i>rarA</i> , and <i>oqxA</i> |   |           |            |                 |                  |            |                                      |                                      |
| TNSKP42                                                                                                                                    | 4 | 1.0 ± 0.3 | 1.1 ± 0.0  | 2.0 ± 0.4       | 1.2 ± 0.2        | >800       | Silent mutation<br>Missense mutation | Silent mutation<br>Missense mutation |
| Clinical isolates with baseline expression of <i>acrA</i> , <i>ramA</i> , <i>rarA</i> , <i>oqxA</i> , and <i>kpgA</i>                      |   |           |            |                 |                  |            |                                      |                                      |
| TNSKP43                                                                                                                                    | 3 | 0.9 ± 0.2 | 0.8 ± 0.2  | 1.2 ± 1.1       | 0.4 ± 0.1        | 1.2 ± 0.1  | Nonsense mutation                    | Silent mutation                      |

6 <sup>a</sup>Relative expression compared with KP478 (expression = 1). Results are means of 3 runs ± standard deviation.

7 <sup>b</sup>MIC of tigecycline.
